# Supplementary material for: Dynamical insights into the mechanism of a droplet detachment from a fiber
Source: Royal Society of Chemistry journal article supplement (doi:10.1039/c8sm01257a), 2018-01-01
Supplement: c8sm01257a1.pdf [file c8sm01257a1.pdf]

## Supporting information for: Dynamical Insights into the Mechanism of a Droplet Detachment from a Fiber

Neda Ojaghloou<sup>a</sup>, Hooman V. Tafreshi<sup>b</sup>, D. Bratko<sup>a,\*</sup>, and Alenka Luzar<sup>a,\*</sup>

<sup>a</sup> Department of Chemistry, Virginia Commonwealth University, Richmond, Virginia 23284, United States

<sup>b</sup> Department of Mechanical and Nuclear Engineering, Virginia Commonwealth University, Richmond, Virginia 23284, United States

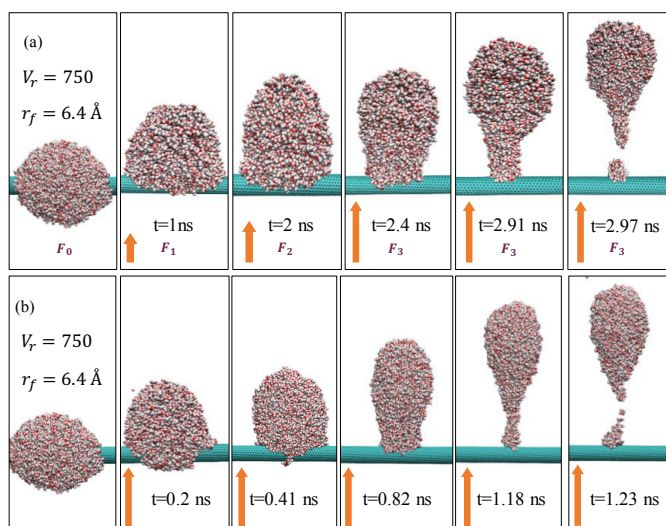

**Figure S1.** Snapshots from a MD trajectory during the droplet detachment from a fiber for the atomistic model with  $V_r = 750$  and fiber radius  $r_f = 6.4 \text{ \AA}$ . (1-a): snapshots at different times  $t$  and corresponding external forces  $F_0=0$ ,  $F_1=0.0041$ ,  $F_2=0.0046$ , and  $F_3=0.005 \text{ kJ mol}^{-1} \text{ \AA}^{-1}$ . The force is increased gradually until the drop is about to detach from the fiber. (1-b): snapshots showing the evolution of droplet shape at constant force,  $F=0.0058 \text{ kJ mol}^{-1} \text{ \AA}^{-1}$ , exerted on the droplet during the simulation.

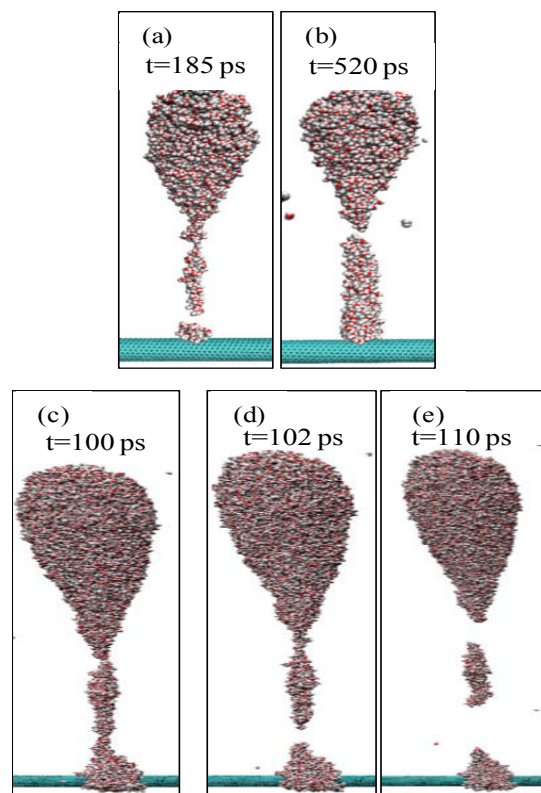

**Figure S2.** Snapshots from MD trajectories of the droplet detachment from a fiber for the atomistic model. Figures a-b show that the breakup takes place at different distances from the fiber and different times during two different atomistic simulation runs with  $V_f = 500$ . The droplet consists of 4000 SPC/E water molecules and the fiber radius is  $6.4 \text{ \AA}$ . The force is  $F=0.0125 \text{ kJ mol}^{-1} \text{ \AA}^{-1}$ . Figures c-e show the formation of a satellite droplet following the detachment of the drop from the fiber under the force  $F=0.0292 \text{ kJ mol}^{-1} \text{ \AA}^{-1}$  for the atomistic water model and  $V_f = 2000$ . The droplet contains 17000 SPC/E water molecules and the fiber radius  $r_f = 6.4 \text{ \AA}$ .
